# Supplementary material
Source: PubMed Central journal article supplement (PMC2488299)
Supplement: E07-10-0988_1.pdf [file E07-10-0988_1.pdf]

### **Supplementary Figure 1**

Relocation of GFP-Cbl upon EGF stimulation. (A-D) CHO cells transiently expressing EGFR and GFP-Cbl were observed in the absence of EGF (A), or the cells were stimulated with 1 µg/ml Texas Red-EGF (B and C) or 100 ng/ml EGF (D) for the indicated time periods. In D, myc-Rab5(Q79L) was also expressed and the image is the localization of GFP-Cbl. Bars, 20 µm.

### **Supplementary Figure 2**

Localization of FLAG-E2s upon EGF stimulation. CHO cells were transiently transfected with EGFR, GFP-Cbl and the indicated FLAG-E2 plasmids and stimulated with EGF for 15 min. The cells were stained with the anti-FLAG antibody. Bars, 20 µm.

### **Supplementary Figure 3**

Control experiments for the knockdown of E2s. HeLa cells were depleted of Ubc4/5 or UbcH7 to examine ubiquitination and degradation of EGFR as described in MATERIALS AND METHODS. (A) The receptor degradation at 30 min was retarded by the depletion of Ubc4/5 but not UbcH7. (B) Effects of other dsRNAs (4/5 #2 and H7 #2) were tested in parallel with the experiment shown in A. For 4/5 #2, sense sequence 5'-GAUCACAGUGGUCGCCUGCTT-3' and antisense sequence 5'-GCAGGCGACCACUGUGAUCTT-3' were used according to the previous report (*J. Biol. Chem.*, 2004, 279, 42169-42181). For H7 #2, sense sequence 5'-AAAUGUGGGAUGAAAAACUUCTT-3' and antisense sequence 5'-GAAGUUUUUCAUCCCACAUUUTT-3' were used according to the previous report (*Mol. Cell Biol.*, 2004, 24, 8716-8726). Compared to the original dsRNA, 4/5 #2 was less effective: it decreased the Ubc4/5 protein level and EGFR ubiquitination to 41 and 75%, respectively. The 4/5 #2 dsRNA retarded the EGFR degradation, but not so severely as the original dsRNA did: at 60 min, 59% of the receptor was remaining in

cells treated with 4/5 #2 and 70% with the original dsRNA (shown in A). Thus, the effects of the 4/5 #2 dsRNA were all modest, arguing against the possibility that the effects of the original dsRNA were nonspecific. Although the 7 #2 dsRNA depleted UbcH7 less effectively, the protein level was decreased to 24%. Nonetheless, this dsRNA did not attenuate the EGFR ubiquitination at all. The receptor degradation was slightly delayed by the 7 #2 dsRNA, but the effect was only marginal compared with that of the Ubc4/5 knockdown. (C) After depletion of either Ubc4/5 or UbcH7 using the original dsRNA, the cells were stimulated for 5 min with 20 ng/ml EGF. The depletion of Ubc4/5, but not UbcH7, attenuated the receptor ubiquitination.

#### **Supplementary Figure 4**

Non-linear reactivity of the polyubiquitin-specific antibody FK1. (A) The samples in Figure 5 were serially diluted and the signal intensities were quantitated. (B) The samples in Figure 6C at 10 min of EGF stimulation were serially diluted and the signal intensities were quantitated.

#### **Supplementary Figure 5**

Effects of AG1478 on HEK293T cells transiently expressing EGFR and HA-Cbl. After 10 min of EGF stimulation, AG1478 was added to the medium at a final concentration of 20 nM, and the cells were further incubated for 10 min. The immunoprecipitation and immunoblotting were done as described in Figure 7. HA-tagged and endogenous c-Cbl are not distinguishable from their migration on the gel.

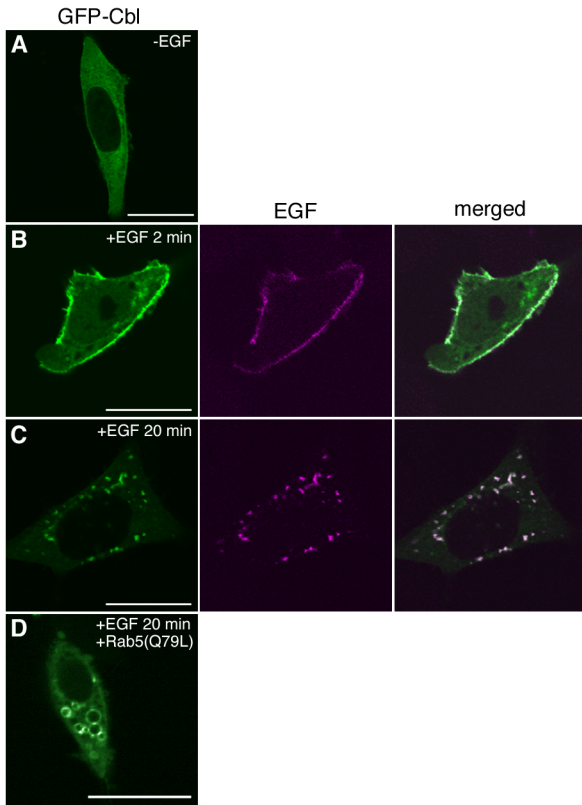

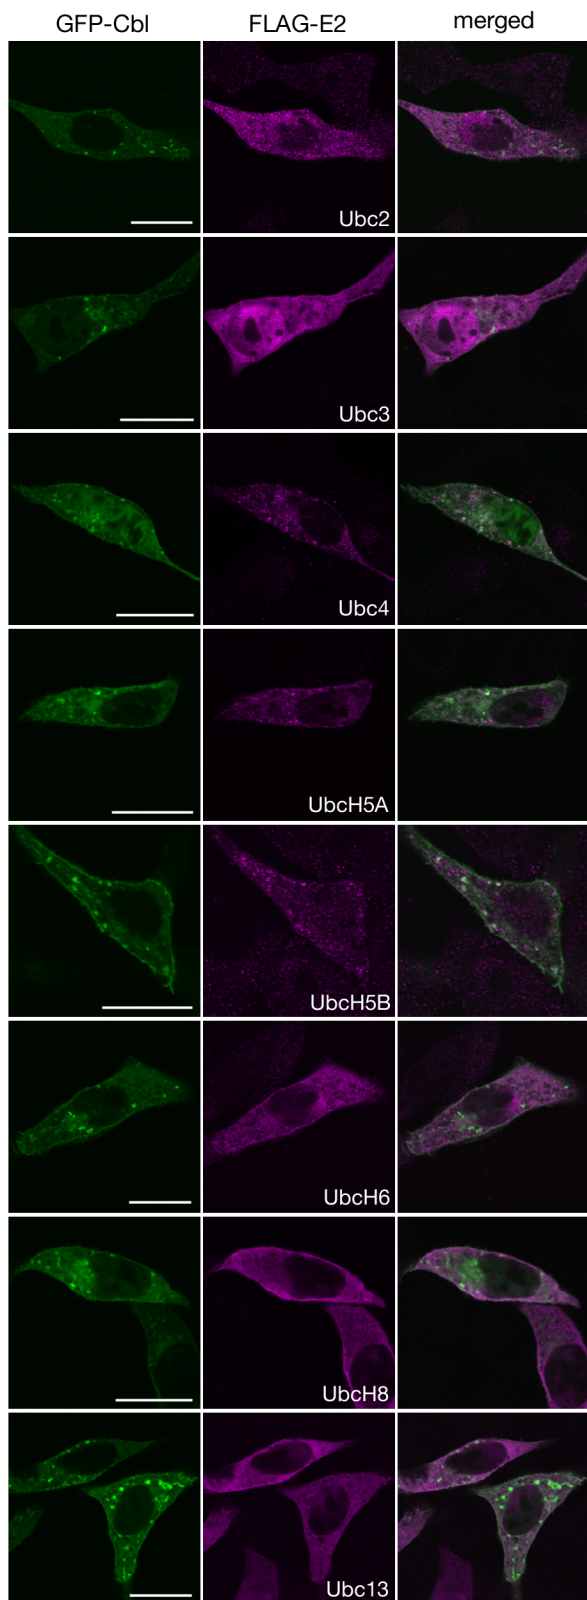

Umeybayashi *et al.*, Supplementary Figure 2

**A**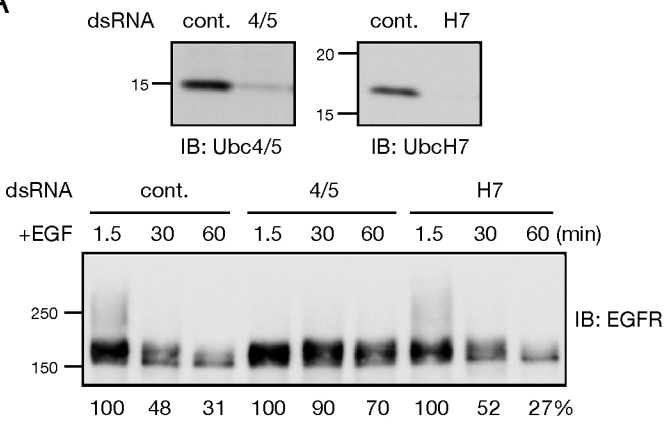**B**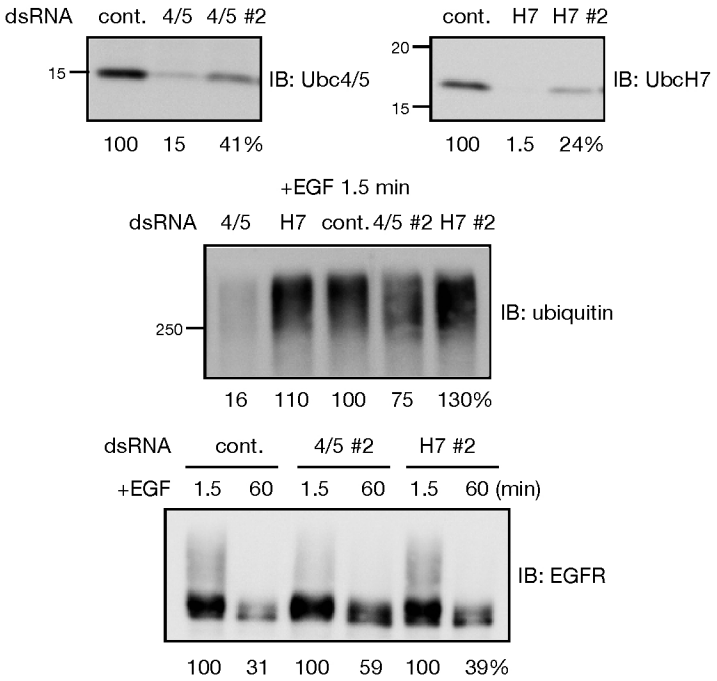**C**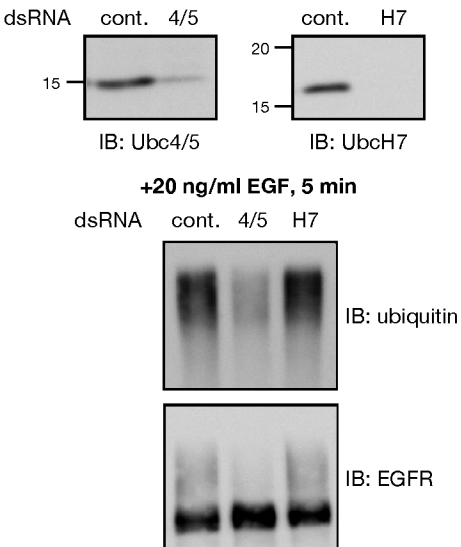

**A**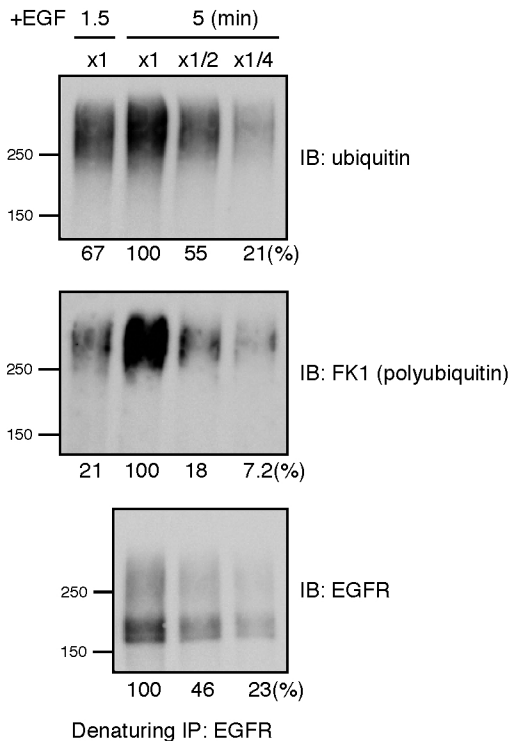**B**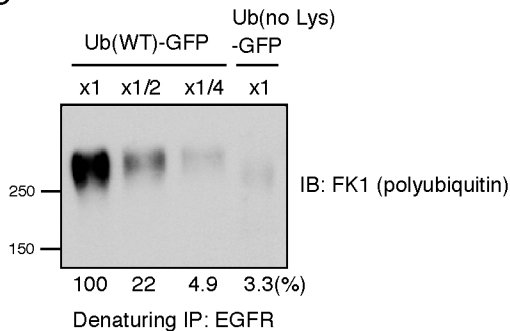

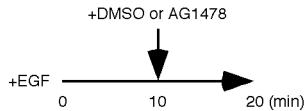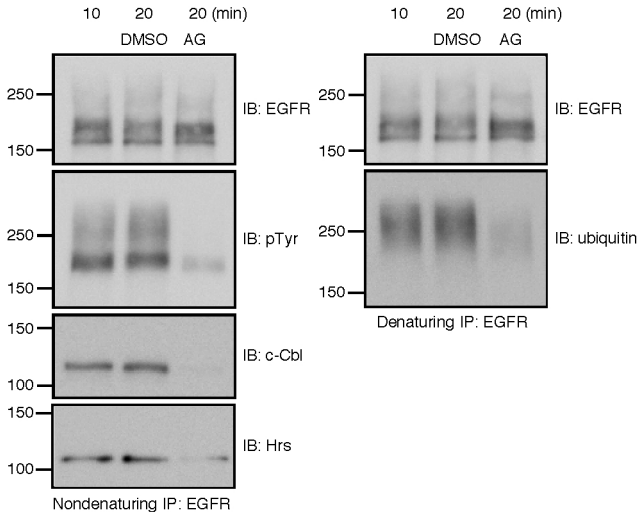

Umehayashi *et al.*, Supplementary Figure 5
